# Supplementary material for: Novel high-efficiency visible-light responsive Ag4(GeO4) photocatalyst
Source: Royal Society of Chemistry journal article supplement (doi:10.1039/c7cy00393e), 2017-01-01
Supplement: c7cy00393e1.pdf [file c7cy00393e1.pdf]

## Electronic Supplementary Information

### Novel high-efficiency visible-light response $\text{Ag}_4(\text{GeO}_4)$ photocatalyst

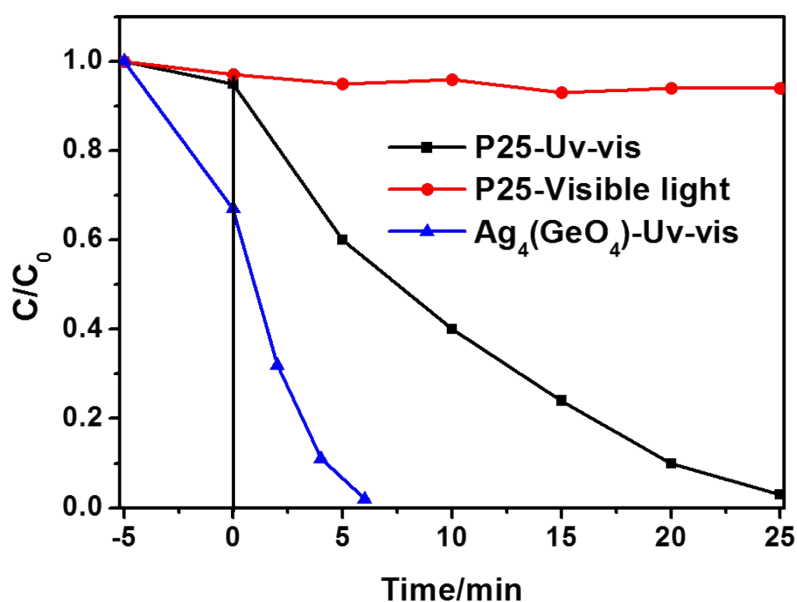

Fig.S1 Photodegradation of MB solution under visible or UV-Vis light irradiation with commercial P25 and  $\text{Ag}_4(\text{GeO}_4)$

|                  | $\text{Ag}_4(\text{GeO}_4)$ | $\text{Ag}_2\text{O}$ | $\text{C}_3\text{N}_4$ |
|------------------|-----------------------------|-----------------------|------------------------|
| $k$              | 0.125                       | 0.043                 | 0.021                  |
| $k_{\text{BET}}$ | 0.00665                     | 0.00796               | 0.0015                 |

Table1. Degradation constants of the samples before ( $k$ ) and after ( $k_{\text{BET}}$ ) being normalized with surface areas.

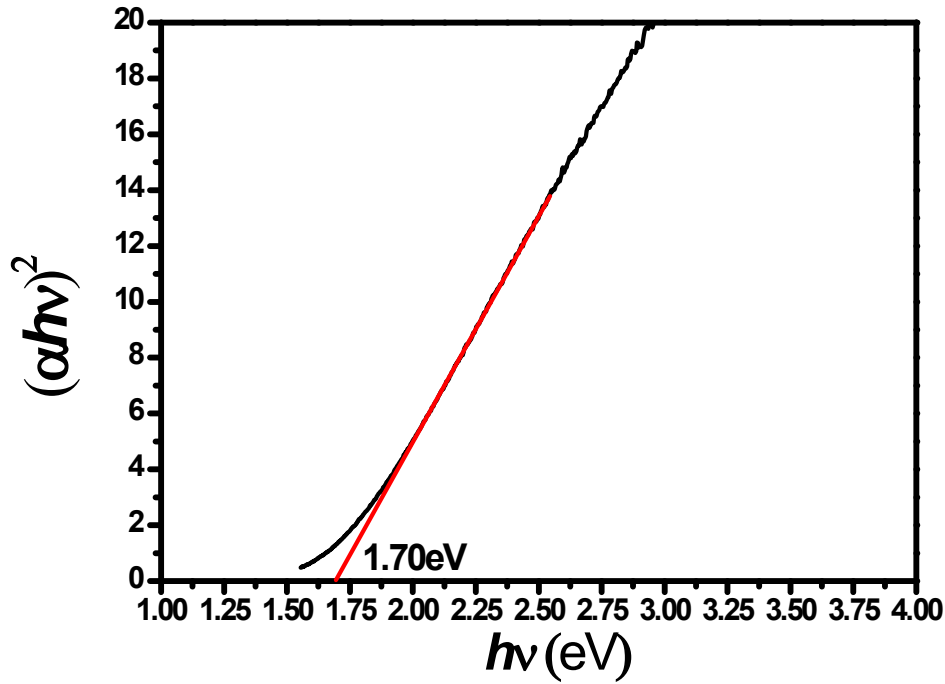

Fig.S2  $(\alpha h\nu)^2$  versus  $(h\nu)$  plot of the  $\text{Ag}_4(\text{GeO}_4)$  sample.

#### Calculations of the VB and CB edges of $\text{Ag}_4(\text{GeO}_4)$

For a semiconductor, the absorbance near the absorption edge is described by the

formula:  $\alpha h\nu = A(h\nu - E_g)^{n/2}$ , where  $\alpha$  is the absorption coefficient,  $h\nu$  is the photon energy,  $A$  is a constant and  $E_g$  is the band gap. For  $\text{Ag}_4(\text{GeO}_4)$ ,  $n = 4$  for indirect transition, the result is shown in Fig.S2.

The VB edge of a semiconductor at the point of zero charge ( $E_{VB}^0$ ) is empirically expressed as<sup>[1-3]</sup>,

$$E_{VB}^0 = \chi_{\text{comp}} - 2.30RT (\text{pH}_{\text{zpc}} - \text{pH}) / F - E^e - \frac{1}{2}E_g \quad (1)$$

In this formular  $R$  is the gas constant,  $T$  is temperature, and  $F$  is Faraday constant.  $E_g$  is the band gap of the semiconductor, and  $E^e$  the energy of the free electrons on the hydrogen scale (i. e.,  $E^e = 4.5$  eV). Under the reasonable assumption that the solution's pH value at the zero point of charge,  $\text{pH}_{\text{ZPC}}$ , is very close to the solution's pH value,  $\text{pH}$ , we obtain

$$E_{VB}^0 \approx E_{VB} \approx \chi_{\text{comp}} - E^e - \frac{1}{2}E_g \quad (2)$$

$\chi_{\text{comp}}$  is the electronegativity of a compound which is given by the geometric mean of the electronegativity of the constituent atoms, which expressed as the mean geometric of absolute

electronegativity of all the constituent atoms,  $E_e$  means the free electrons energy contrasting to the hydrogen scale (4.5 eV vs NHE),  $E_g$  is the semiconductor band gap energy. that is <sup>4</sup>,

$$\chi_{\text{comp}} = \sqrt[N]{\chi_1^r \chi_2^s \cdots \chi_3^p \chi_4^q}, \quad (3)$$

where  $\chi$  and  $N$  are the electro negativity of the constituent atom, the number of the species, and the total number of atoms in the compound, respectively . The superscripts  $r, s, p, \dots, q$  refer to the numbers of the atoms 1, 2, ...,  $n-1$  and  $n$ , respectively in the molecule, respectively, so that  $r + s + \cdots + p + q = N$ . From its UV/Vis diffuse reflectance spectrum, the band gap of  $\text{Ag}_9(\text{SiO}_4)_2\text{NO}_3$  is estimated to be 1.70 eV. The values of O, Ge and Ag are 7.54, 4.78, 4.44 respectively <sup>5</sup>.

Thus, from Eq. 2, the VB edge of  $\text{Ag}_4(\text{GeO}_4)$  is estimated to be 2.01 eV with respect to the normal hydrogen electrode (NHE) Consequently, on the basis of its band gap (1.70 eV), the VB edge of  $\text{Ag}_4(\text{GeO}_4)$  is determined to be 0.31 eV with respect to the NHE.

<sup>1</sup>S. R. Morrison, *Electrochemistry at Semiconductor and Oxidized Metal Electrodes*, Plenum Press, New York, 1980.

<sup>2</sup>M. A. Butler, D. S. Ginley, *J. Electrochem. Soc.* 1978, 125, 228-232.

<sup>3</sup>Y. Xu, M. Schoonen, *Am. Mineral*, 2000, 85, 543-556.

<sup>4</sup>R. T. Sanderson, *Chemical Periodicity*, Reinhold, New York 1960.

<sup>5</sup>D. Yu, Z.-D. Chen, F. Wang, S.-Z. Li, *Acta Phys. Chim. Sin.* 2001, 17, 15-22.

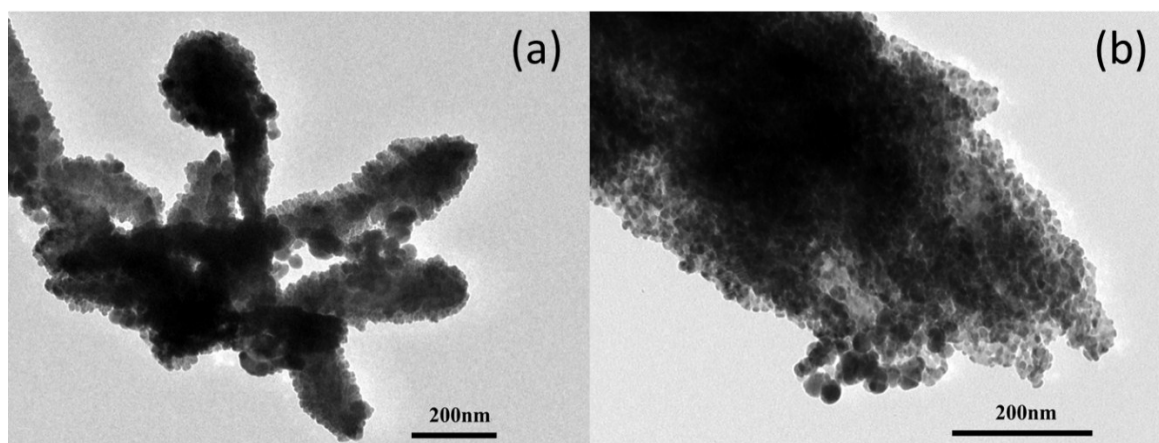

Fig.S3 TEM images of the  $\text{Ag}_4(\text{GeO}_4)$  sample.

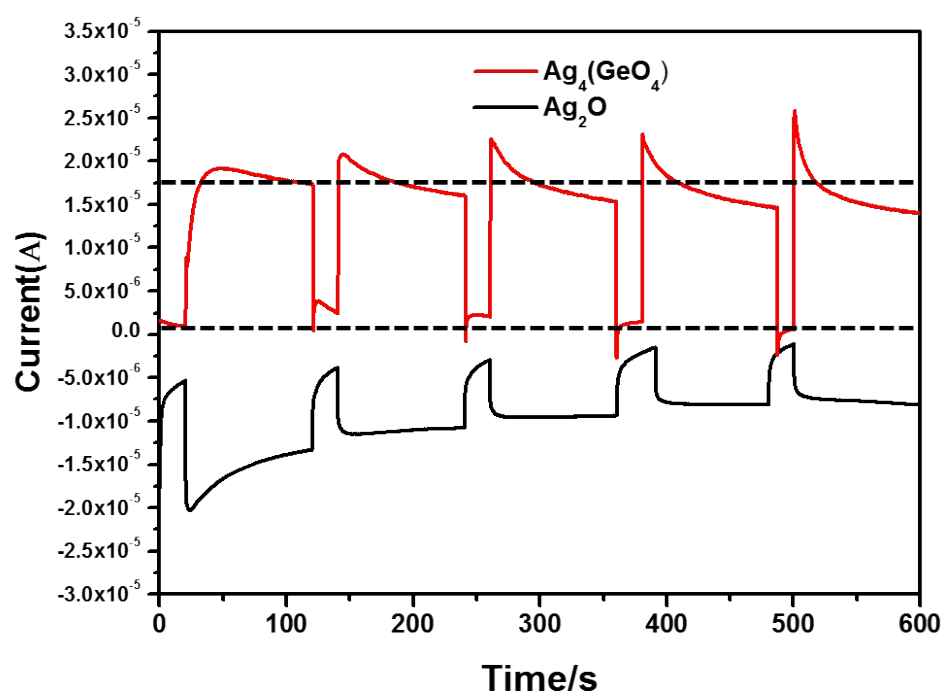

Fig.S4 Photocurrents of the  $\text{Ag}_4(\text{GeO}_4)$  and  $\text{Ag}_2\text{O}$  sample.
